# Supplementary material
Source: MDPI journal article supplement (https://www.mdpi.com/2075-163X/12/3/358)
Supplement: s1 [file s1]

# Supplementary

## Simultaneous Sequestration of Co<sup>2+</sup> and Mn<sup>2+</sup> by Fungal Manganese Oxide through Asbolane Formation

Miku Aoshima <sup>1</sup>, Yukinori Tani <sup>1,2,\*</sup>, Rina Fujita <sup>2</sup>, Kazuya Tanaka <sup>3</sup>, Naoyuki Miyata <sup>4</sup>, Kazuhiro Umezawa <sup>1,2</sup>

<sup>1</sup> Department of Environmental Health Sciences, Graduate School of Nutritional and Environmental Sciences, University of Shizuoka, 52-1 Yada, Shizuoka 422-8526, Japan; s21309@u-shizuoka-ken.ac.jp (M.A.), k.umezawa@u-shizuoka-ken.ac.jp (K.U.)

<sup>2</sup> Department of Environmental and Life Sciences, School of Food and Nutritional Sciences, University of Shizuoka, 52-1 Yada, Shizuoka 422-8526, Japan; rf58753@gmail.com

<sup>3</sup> Advanced Science Research Center, Japan Atomic Energy Agency, Tokai, Ibaraki 319-1195, Japan; tanaka.kazuya@jaea.go.jp

<sup>4</sup> Department of Biological Environment, Akita Prefectural University, Shimoshinjo-Nakano, Akita 010-0195, Japan; nmiyata@akita-pu.ac.jp

\* Correspondence: taniy@u-shizuoka-ken.ac.jp; Tel.: +81-54-264-5797

Table S1, and Figures S1-S5.

**Table S1** Summary of repeated treatment experiments for newly formed and heated biogenic manganese oxides (BMOs)<sup>a</sup> under aerobic conditions at pH 7.0<sup>b</sup>.

| Condition                                                   |        | Sequestration efficiency <sup>c</sup> (%) (added ions; mM) |             |                  | Two-step extraction |                  |               |               |                  |               |
|-------------------------------------------------------------|--------|------------------------------------------------------------|-------------|------------------|---------------------|------------------|---------------|---------------|------------------|---------------|
|                                                             |        | Co <sup>2+</sup>                                           |             | Mn <sup>2+</sup> | Total Co (mM)       | Exchangeable (%) | Reducible (%) | Total Mn (mM) | Exchangeable (%) | Reducible (%) |
| Newly formed<br>Aerobic<br>Only Mn <sup>2+</sup><br>(n = 4) | Before |                                                            |             |                  | -                   | -                | -             | 0.87±0.04     | 13.6±0.3         | 86.4±0.3      |
|                                                             | 1st    | -                                                          | >99         | (0.84±0.10)      | -                   | -                | -             | 1.79±0.05     | 15.2±0.5         | 84.8±0.5      |
|                                                             | 2nd    | -                                                          | >99         | (0.77±0.14)      | -                   | -                | -             | 2.70±0.06     | 13.3±0.2         | 86.7±0.2      |
|                                                             | 3rd    | -                                                          | 98.8±0.3    | (0.78±0.03)      | -                   | -                | -             | 3.60±0.04     | 11.6±0.1         | 88.6±0.1      |
|                                                             | Total  | -                                                          | >99         |                  | -                   | -                | -             |               |                  |               |
| Newly formed<br>Aerobic<br>Only Co <sup>2+</sup><br>(n = 4) | Before |                                                            |             |                  | -                   | -                | -             | 1.00±0.06     | 15.1±0.2         | 84.9±0.2      |
|                                                             | 1st    | >99                                                        | (0.16±0.00) | -                | 0.14±0.00           | 49.4±1.7         | 50.6±1.7      | 0.87±0.04     | 6.4±0.4          | 93.6±0.4      |
|                                                             | 2nd    | 70.0±1.3                                                   | (0.16±0.00) | -                | 0.27±0.02           | 56.8±1.5         | 43.2±1.5      | 0.83±0.07     | 4.0±0.5          | 96.0±0.5      |
|                                                             | 3rd    | 36.3±6.2                                                   | (0.17±0.02) | -                | 0.32±0.01           | 59.1±1.5         | 40.9±1.5      | 0.79±0.02     | 1.9±0.0          | 98.0±0.0      |
|                                                             | Total  | 68.4±1.5                                                   |             | -                |                     |                  |               |               |                  |               |
| Newly formed<br>Aerobic<br>Only Co <sup>2+</sup><br>(n = 3) | Before |                                                            |             |                  | -                   | -                | -             | 1.05±0.02     | 15.0±0.4         | 85.0±0.4      |
|                                                             | 1st    | 85.9±1.5                                                   | (0.42±0.00) | -                | 0.43±0.02           | 51.5±0.6         | 48.5±0.6      | 1.08±0.16     | 3.6±0.1          | 96.4±0.1      |
|                                                             | 2nd    | 43.4±1.7                                                   | (0.43±0.01) | -                | 0.72±0.02           | 45.4±1.9         | 54.6±1.9      | 1.28±0.14     | 2.7±0.1          | 97.3±0.1      |
|                                                             | 3rd    | 23.7±1.6                                                   | (0.43±0.01) | -                | 0.68±0.01           | 44.0±0.7         | 56.0±0.7      | 0.89±0.04     | 3.0±0.1          | 97.0±0.1      |
|                                                             | Total  | 51.0±0.8                                                   |             | -                |                     |                  |               |               |                  |               |
| Newly formed<br>Aerobic<br>Only Co <sup>2+</sup><br>(n = 4) | Before |                                                            |             |                  | -                   | -                | -             | 1.04±0.05     | 13.2±0.2         | 86.8±0.2      |
|                                                             | 1st    | 85.4±0.8                                                   | (0.81±0.01) | -                | 0.75±0.00           | 38.4±0.1         | 61.6±0.1      | 1.01±0.02     | 2.8±0.1          | 97.2±0.1      |
|                                                             | 2nd    | 47.7±1.1                                                   | (0.80±0.01) | -                | 1.19±0.02           | 29.9±0.7         | 70.1±0.7      | 1.01±0.04     | 2.2±0.2          | 97.8±0.2      |
|                                                             | 3rd    | 24.4±1.9                                                   | (0.80±0.01) | -                | 1.24±0.11           | 29.4±3.0         | 70.6±3.0      | 0.81±0.10     | 2.6±0.3          | 97.4±0.3      |
|                                                             | Total  | 52.7±0.7                                                   |             | -                |                     |                  |               |               |                  |               |
| Newly formed<br>Aerobic<br>Only Co <sup>2+</sup><br>(n = 4) | Before |                                                            |             |                  | -                   | -                | -             | 0.89±0.04     | 14.2±0.31        | 85.8±0.1      |
|                                                             | 1st    | 86.4±0.6                                                   | (1.29±0.02) | -                | 1.14±0.02           | 25.9±0.8         | 74.1±0.8      | 0.83±0.04     | 3.1±0.1          | 96.9±0.1      |
|                                                             | 2nd    | 42.4±1.5                                                   | (1.29±0.01) | -                | 1.58±0.03           | 21.6±0.4         | 78.4±0.4      | 0.80±0.02     | 2.5±0.0          | 97.5±0.0      |
|                                                             | 3rd    | 19.2±1.9                                                   | (1.26±0.02) | -                | 2.03±0.03           | 17.7±0.5         | 82.3±0.5      | 0.86±0.01     | 1.9±0.0          | 88.1±0.0      |
|                                                             | Total  | 49.6±0.8                                                   |             | -                |                     |                  |               |               |                  |               |
| Newly formed<br>Aerobic<br>Only Co <sup>2+</sup><br>(n = 4) | Before |                                                            |             |                  | -                   | -                | -             | 0.81±0.01     | 14.7±0.3         | 85.3±0.3      |
|                                                             | 1st    | 81.5±3.6                                                   | (1.75±0.02) | -                | 1.41±0.03           | 22.6±0.7         | 77.4±0.7      | 0.81±0.03     | 1.6±0.1          | 98.4±0.1      |
|                                                             | 2nd    | 32.8±3.6                                                   | (1.72±0.02) | -                | 1.93±0.16           | 18.2±1.3         | 81.8±1.3      | 0.81±0.08     | 1.1±0.1          | 98.9±0.1      |
|                                                             | 3rd    | 13.2±2.6                                                   | (1.70±0.03) | -                | 1.80±0.09           | 17.1±0.4         | 82.9±0.4      | 0.76±0.06     | 15.6±0.8         | 84.4±0.8      |
|                                                             | Total  | 42.9±3.1                                                   |             | -                |                     |                  |               |               |                  |               |
| Heated<br>Aerobic<br>Only Co <sup>2+</sup><br>(n = 4)       | Before |                                                            |             |                  | -                   | -                | -             | 0.99±0.02     | 15.5±0.3         | 84.5±0.3      |
|                                                             | 1st    | 23.1±2.8                                                   | (0.84±0.01) | -                | 0.24±0.01           | 58.2±0.3         | 41.8±0.3      | 0.87±0.02     | 4.5±0.1          | 95.5±0.1      |
|                                                             | 2nd    | 10.7±6.9                                                   | (0.87±0.06) | -                | 0.28±0.02           | 56.0±1.3         | 44.0±1.3      | 0.82±0.06     | 3.1±0.2          | 96.9±0.2      |
|                                                             | 3rd    | 5.3±1.6                                                    | (0.84±0.01) | -                | 0.33±0.02           | 47.0±0.8         | 53.0±0.8      | 0.78±0.05     | 2.9±0.2          | 97.1±0.2      |
|                                                             | Total  | 13.1±3.2                                                   |             | -                |                     |                  |               |               |                  |               |

a: BMOs were formed by cultivating *Acremonium strictum* KR21-2 in HAY liquid media with 1 mM MnSO<sub>4</sub> for 72h. b: HEPES buffer (100 mM) was used to maintain solution pH at pH7.0.

c: Sequestration efficiency was calculated from the concentration difference before and after treatments.

Table S1 (continued)

| Condition                          | Sequestration efficiency (%) (added ions; mM) |                  |             |                  |             |               | Two-step extraction |               |               |                  |               |
|------------------------------------|-----------------------------------------------|------------------|-------------|------------------|-------------|---------------|---------------------|---------------|---------------|------------------|---------------|
|                                    |                                               | Co <sup>2+</sup> |             | Mn <sup>2+</sup> |             | Total Co (mM) | Exchangeable (%)    | Reducible (%) | Total Mn (mM) | Exchangeable (%) | Reducible (%) |
| Newly formed                       | 1st                                           | >99              | (0.16±0.01) | >99              | (0.79±0.07) | 0.18±0.00     | 19.7±0.5            | 80.3±0.5      | 0.90±0.07     | 14.9±0.2         | 85.1±0.2      |
| Aerobic                            | 2nd                                           | >99              | (0.16±0.00) | >99              | (0.76±0.03) | 0.38±0.01     | 21.6±0.3            | 78.4±0.3      | 1.85±0.07     | 11.2±0.2         | 88.8±0.2      |
| Co <sup>2+</sup> /Mn <sup>2+</sup> | 3rd                                           | >99              | (0.17±0.00) | >99              | (0.82±0.05) | 0.56±0.01     | 20.6±0.6            | 79.4±0.6      | 2.79±0.05     | 8.3±0.3          | 91.7±0.3      |
| (n = 4)                            | Total                                         | >99              |             | >99              |             |               |                     |               | 3.75±0.10     | 8.1±0.2          | 91.9±0.2      |
| Newly formed                       | 1st                                           | 97.5±0.7         | (0.42±0.01) | 97.9±0.1         | (0.77±0.01) | 0.49±0.00     | 38.5±0.9            | 61.5±0.9      | 0.99±0.01     | 17.0±0.5         | 83.0±0.5      |
| Aerobic                            | 2nd                                           | 86.8±2.8         | (0.43±0.01) | 97.9±0.3         | (0.83±0.08) | 0.92±0.01     | 29.2±0.3            | 70.8±0.3      | 1.93±0.07     | 5.8±0.4          | 94.2±0.4      |
| Co <sup>2+</sup> /Mn <sup>2+</sup> | 3rd                                           | 63.3±7.3         | (0.42±0.00) | 91.9±3.6         | (0.82±0.05) | 1.18±0.04     | 24.3±1.1            | 75.7±1.1      | 2.84±0.05     | 4.3±0.0          | 95.7±0.0      |
| (n = 3)                            | Total                                         | 82.5±3.6         |             | 95.9±1.4         |             |               |                     |               | 3.53±0.10     | 5.1±0.3          | 94.9±0.3      |
| Newly formed <sup>d</sup>          | 1st                                           | 92.7±1.0         | (0.79±0.01) | >99              | (0.88±0.03) | 0.82±0.02     | 32.4±0.6            | 67.6±0.2      | 1.05±0.00     | 15.2±0.5         | 84.8±0.5      |
| Aerobic                            | 2nd                                           | 71.6±3.5         | (0.80±0.02) | 98.5±0.2         | (0.84±0.02) | 1.52±0.04     | 26.2±0.8            | 73.8±0.8      | 1.97±0.07     | 3.7±0.1          | 96.3±0.1      |
| Co <sup>2+</sup> /Mn <sup>2+</sup> | 3rd                                           | 48.4±7.8         | (0.81±0.01) | 87.3±6.6         | (0.85±0.01) | 1.93±0.04     | 21.5±1.9            | 78.5±1.9      | 3.08±0.07     | 4.7±0.6          | 95.3±0.6      |
| (n = 4)                            | Total                                         | 70.8±4.0         |             | 95.0±2.2         |             |               |                     |               | 3.85±0.18     | 5.5±0.3          | 94.5±0.3      |
| Newly formed                       | 1st                                           | 76.7±2.4         | (1.41±0.02) | 97.8±0.8         | (0.75±0.01) | 0.61±0.03     | 22.5±0.3            | 77.5±0.3      | 0.81±0.03     | 19.4±0.2         | 80.6±0.2      |
| Aerobic                            | 2nd                                           | 34.4±5.3         | (1.44±0.04) | 82.8±4.3         | (0.77±0.03) | 1.09±0.07     | 17.5±0.6            | 82.5±0.6      | 1.39±0.04     | 7.3±0.1          | 92.7±0.1      |
| Co <sup>2+</sup> /Mn <sup>2+</sup> | 3rd                                           | 20.6±4.4         | (1.49±0.05) | 44.1±5.9         | (0.76±0.04) | 1.75±0.06     | 20.1±1.0            | 79.9±1.0      | 2.06±0.17     | 6.2±0.6          | 93.8±0.6      |
| (n = 4)                            | Total                                         | 43.5±3.2         |             | 74.9±3.0         |             |               |                     |               | 2.91±0.14     | 5.8±0.3          | 94.2±0.3      |
| Newly formed                       | 1st                                           | 66.8±1.4         | (1.74±0.04) | 99.1±0.1         | (0.80±0.01) | 1.32±0.03     | 26.5±0.6            | 73.4±0.6      | 0.81±0.01     | 14.7±0.3         | 85.3±0.3      |
| Aerobic                            | 2nd                                           | 24.9±4.6         | (1.74±0.01) | 74.5±6.4         | (0.81±0.01) | 1.85±0.10     | 21.9±1.3            | 78.1±1.3      | 1.68±0.04     | 2.9±0.1          | 97.1±0.1      |
| Co <sup>2+</sup> /Mn <sup>2+</sup> | 3rd                                           | 8.6±3.8          | (1.69±0.01) | 38.6±2.9         | (0.79±0.01) | 1.81±0.04     | 19.8±1.1            | 80.2±1.1      | 2.35±0.15     | 5.4±0.5          | 94.6±0.5      |
| (n = 4)                            | Total                                         | 33.7±1.7         |             | 70.9±2.1         |             |               |                     |               | 2.38±0.06     | 0.4±0.0          | 99.6±0.0      |
| Heated                             | 1st                                           | 26.2±2.4         | (0.87±0.01) | 6.0±9.8          | (0.89±0.01) | 0.22±0.01     | 46.6±0.4            | 53.4±0.4      | 0.99±0.02     | 15.5±0.2         | 84.5±0.2      |
| Aerobic                            | 2nd                                           | 12.2±2.4         | (0.89±0.02) | 14.2±2.1         | (0.91±0.01) | 0.31±0.01     | 39.9±0.5            | 60.1±0.5      | 0.89±0.06     | 10.6±0.2         | 89.4±0.2      |
| Co <sup>2+</sup> /Mn <sup>2+</sup> | 3rd                                           | 12.1±4.4         | (0.93±0.03) | 12.9±2.5         | (0.93±0.02) | 0.39±0.04     | 37.4±0.9            | 62.6±0.9      | 0.89±0.04     | 9.7±0.2          | 90.3±0.2      |
| (n = 4)                            | Total                                         | 16.7±2.8         |             | 11.1±4.0         |             |               |                     |               | 1.16±0.09     | 13.8±0.2         | 86.2±0.2      |

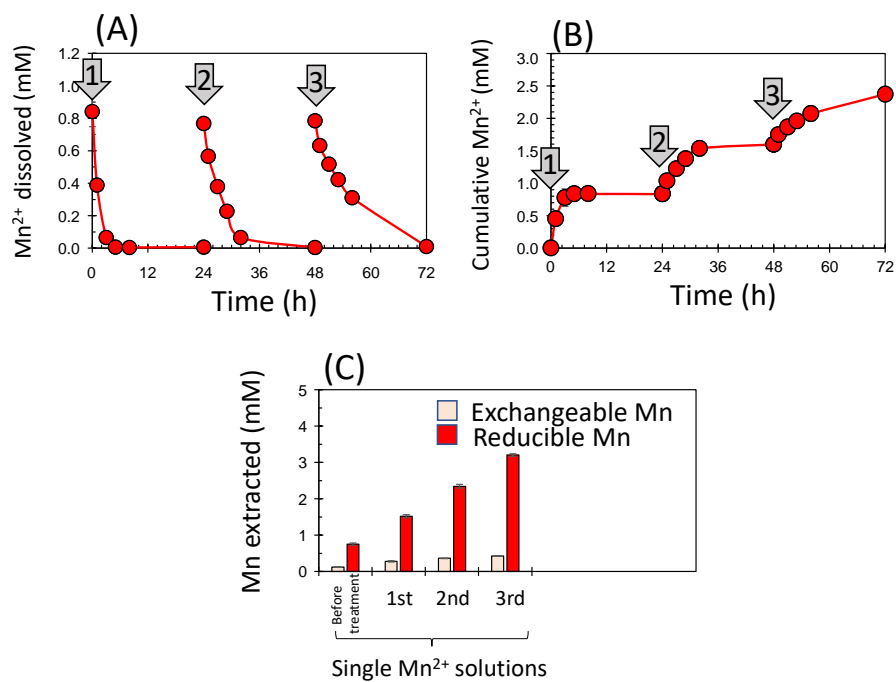

**Figure S1.** Repeated treatment experiments of newly formed biogenic manganese oxides (BMOs; 1 mM as Mn) under aerobic conditions at pH 7.0 (100 mM HEPES buffer) in 0.8 mM exogenous  $\text{Mn}^{2+}$ . (A) Changes in concentrations of dissolved  $\text{Mn}^{2+}$ , and (B) Cumulative concentrations of Mn sequestered. (C) Mn concentrations in exchangeable and reducible phases for BMOs repeatedly treated in 0.8 mM single  $\text{Mn}^{2+}$  solutions. The bathing solutions were renewed every 24 h. Data are shown as mean  $\pm$  standard deviation ( $n = 4$ ).

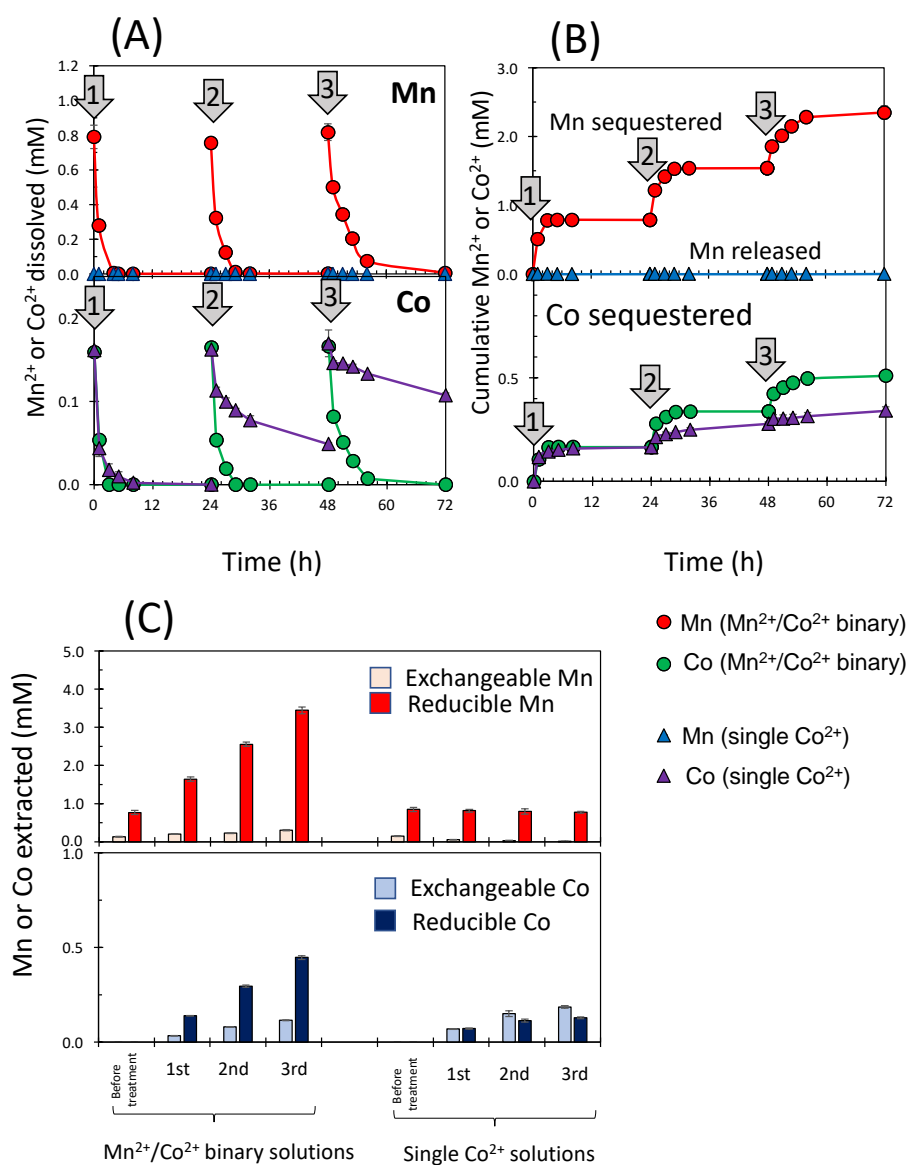

**Figure S2.** Repeated treatment experiments of newly formed biogenic manganese oxides (BMOs; 1 mM as Mn) under aerobic conditions at pH 7.0 (100 mM HEPES buffer) in 0.16 mM Co<sup>2+</sup> solutions with and without 0.8 mM exogenous Mn<sup>2+</sup>. (A) Changes in concentrations of dissolved Mn<sup>2+</sup> and Co<sup>2+</sup>. (B) Cumulative concentrations of sequestered or released Mn, and sequestered Co, where circles represent Mn<sup>2+</sup>/Co<sup>2+</sup> binary systems and triangles represent single Co<sup>2+</sup> systems. (C) Mn and Co concentrations in exchangeable and reducible phases for BMOs repeatedly treated in Mn<sup>2+</sup>/Co<sup>2+</sup> binary and single Co<sup>2+</sup> solutions. Bathing solutions were renewed every 24 h. Data are mean  $\pm$  standard deviation ( $n = 4$ ).

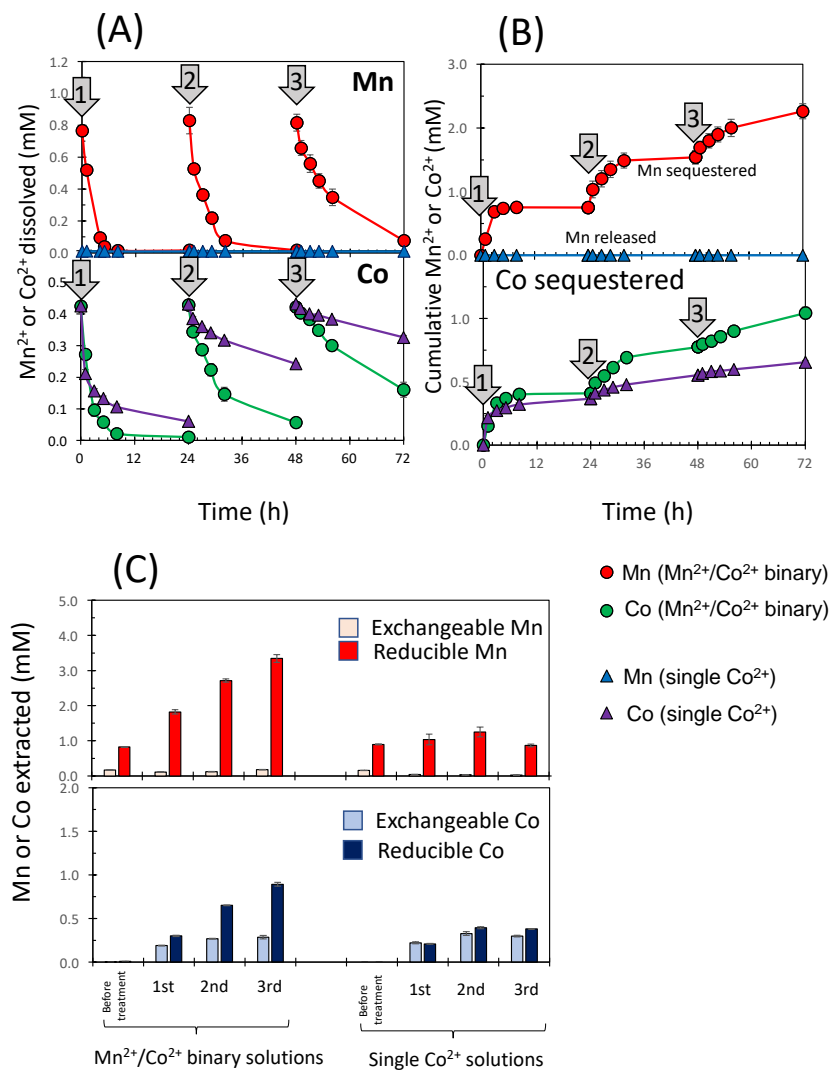

**Figure S3.** Repeated treatment experiments of newly formed biogenic manganese oxides (BMOs; 1 mM as Mn) under aerobic conditions at pH 7.0 (100 mM HEPES buffer) in 0.4 mM  $\text{Co}^{2+}$  solutions with and without 0.8 mM exogenous  $\text{Mn}^{2+}$ . (A) Changes in concentrations of dissolved  $\text{Mn}^{2+}$  and  $\text{Co}^{2+}$ . (B) Cumulative concentrations of sequestered or released Mn, and sequestered Co, where circles represent  $\text{Mn}^{2+}/\text{Co}^{2+}$  binary systems and triangles represent single  $\text{Co}^{2+}$  systems. (C) Mn and Co concentrations in exchangeable and reducible phases for BMOs repeatedly treated in  $\text{Mn}^{2+}/\text{Co}^{2+}$  binary and single  $\text{Co}^{2+}$  solutions. Bathing solutions were renewed every 24 h. Data are mean  $\pm$  standard deviation ( $n = 4$ ).

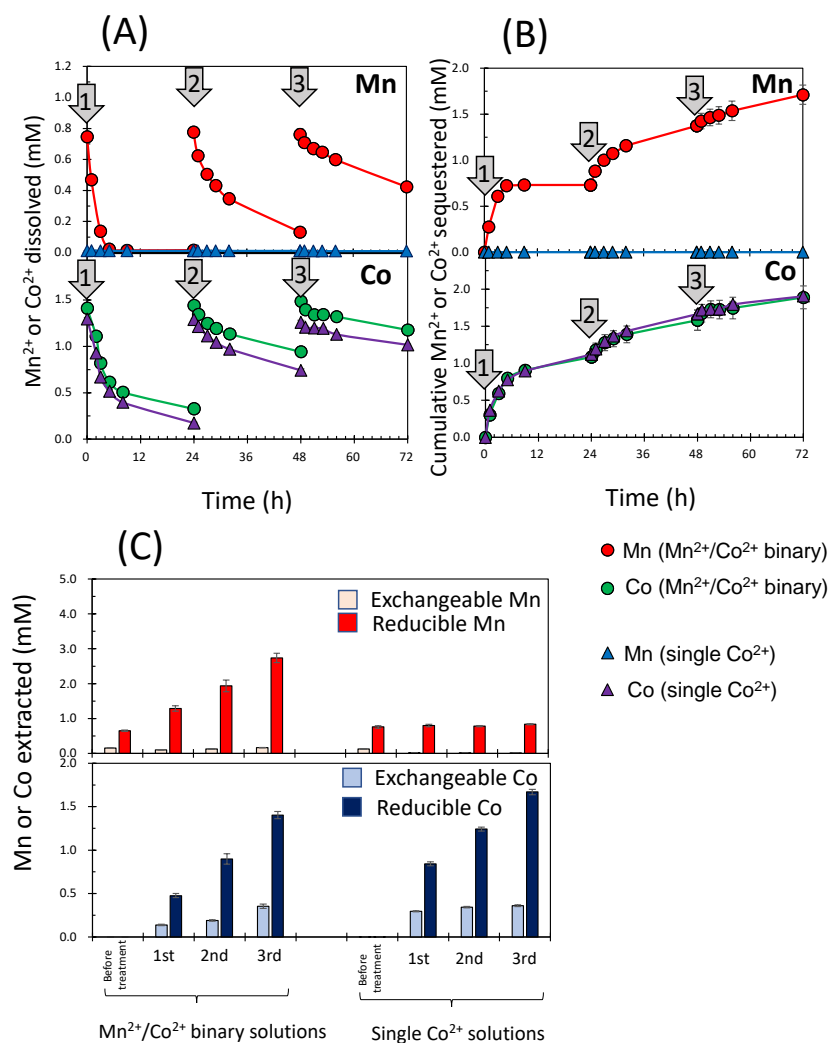

**Figure S4.** Repeated treatment experiments of newly formed biogenic manganese oxides (BMOs; 1 mM as Mn) under aerobic conditions at pH 7.0 (100 mM HEPES buffer) in 1.4 mM  $\text{Co}^{2+}$  solutions with and without 0.8 mM exogenous  $\text{Mn}^{2+}$ . (A) Changes in concentrations of dissolved  $\text{Mn}^{2+}$  and  $\text{Co}^{2+}$ . (B) Cumulative concentrations of sequestered or released Mn, and sequestered Co, where circles represent  $\text{Mn}^{2+}/\text{Co}^{2+}$  binary systems and triangles represent single  $\text{Co}^{2+}$  systems. (C) Mn and Co concentrations in exchangeable and reducible phases for BMOs repeatedly treated in  $\text{Mn}^{2+}/\text{Co}^{2+}$  binary and single  $\text{Co}^{2+}$  solutions. Bathing solutions were renewed every 24 h. Data are mean  $\pm$  standard deviation ( $n = 4$ ).

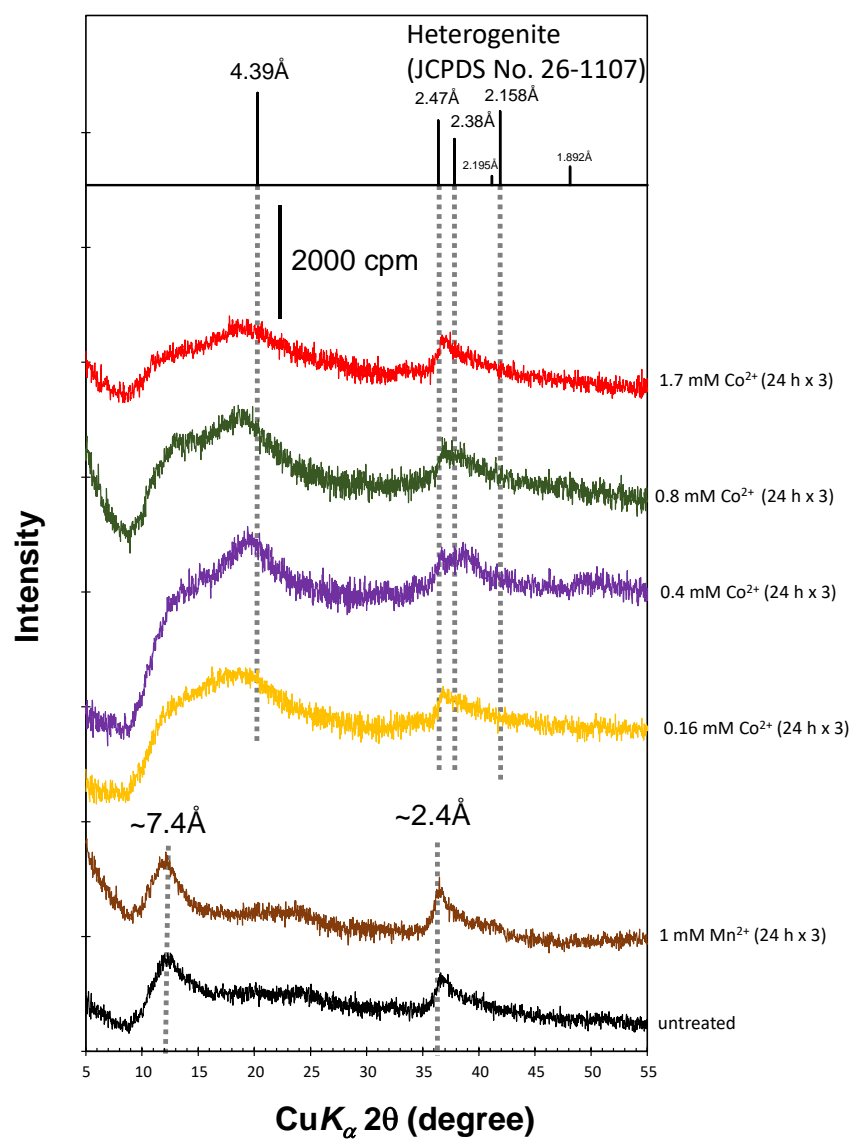

**Figure S5.** Powder X-ray diffraction patterns of newly formed biogenic manganese oxides (1 mM as Mn) before and after repeated treatment experiments in single  $\text{Co}^{2+}$  (0–1.7 mM) solutions under aerobic conditions at pH 7.0 (100 mM HEPES buffer).
